# Supplementary material
Source: publisher figshare collection journal article supplement (https://geolsoc.figshare.com/ndownloader/files/13369889)
Supplement: Supplementary file 1 [file 13369889]

**Supplement 2.** *Equipment schedule for a mining company, issued from Berlin by the Royal Prussian Engineer Committee, Department 4, on 14 July 1917: according to Ingenieur-Komitee (1917a)*

1. 3 miners’ equipment carts, each drawn by a pair of horses, with the following equipment:

a) Entrenching and tool kits for various uses:

| 30 | tethers |
| --- | --- |
| 3 | jemmies |
| 3 | blackened cowhide bags for nails, wire, clamps, etc. |
| 6 | files of different sizes |
| 9 | axe handle wedges |
| 9 | hatchet handle wedges |
| 18 | iron clamps |
| 3 | pincers |
| 3 | claw hammers |
| 3 | carpenter’s iron folding rules, 1 m long |
| 300 | nails of different sizes |
| 6 | nail boring bits of different sizes |
| 3 | hand saws |
| 3 | rip saws |
| 3 | two-man-saws |
| 6 | saw files |
| 3 | mallets |
| 3 | bending irons |
| 3 | wrenches with adjustable lips |
| 3 packs | wood screws |
| 3 packs | carriage and through bolts |
| 3 | hacksaws with 12 blades |
| 18 | short pickaxes |
| 300 | candles |
| 3 | wedges (Fig. 224 Spr. V.) |
| 3 | plumb-lines of 1.5 kg, each with 25 m of copper wire |
| 3 | hemp ropes, diameter 1.5 cm, length 30 m |
| 3 | wooden hemp rope coils with hooks, diameter 25 cm |
| 1 | mine surveying device |
| 3 | winches with crank rods without rack, diameter 20 cm |

b) Demolition equipment:

| 18 | acetylene safety lamps with carbide supply |
| --- | --- |
| 1.5 kg | binding wire |
| 3 | plumber wrenches |
| 9 | small miner’s jemmies |
| 1.5 kg | annealed iron wire, 1 mm thick |
| 3 | electric detonator devices 07 |
| 15 rolls | electrical tape in oil-impregnated paper bags |
| 3 sqm | gutta-percha paper |
| 9 | club hammers |
| 3 | hand-held fans |
| 9 | tool steel hammer-head chisels |
| 3 | helical wood drill bits, bore width 8 mm |
| 3 | helical wood drill bits, bore width 35 mm |
| 1 | geophone system with accessories |
| 6 | cable drum cranks |
| 3 kg | cable wax bars of 0.125 kg each, in cardboard box |
| 12 | galvanised cross sleeves |
| 600 m | blank copper or aluminium wire on drums of 200 m each |
| 600 | copper sleeves |
| 30 | pairs of kneepads |
| 18 | heavy pickaxes with short handle |
| 6 | spare handles for heavy pickaxes |
| 6 sqm | rough canvas |
| 3 | circuit testers with cases and 1 spare element each |
| 9 | clay-cutting picks |
| 6 | mining scrapers |
| 3 | rakers |
| 90 | sandbags |
| 9 | army oxygen breathing apparatuses |
| 3 | miner’s strings |
| 6 | levels |
| 3 | safety lamps including spare parts with box and fuel |
| 18 | spades with short handle |
| 4 | copies of demolition regulations |
| 3 | rock drill bit sets as for a combat engineer company |
| 9 | crowbars of toughened steel |
| 9 | broaches |
| 9 | foldable fabric airducts, diameter approximately 0.15 cm |
| 3 | tool bags with content |
| 6 boxes | fuses |
| 9 | angle irons |
| 900 m | firing cable with 1.5-mm-thick flex (on 9 cable drums) |
| 30 | noise-absorbing overshoes |

c) Carpenter’s and joiner’s equipment:

as for a combat engineer company

d) Lighting:

| 18 | electric torches with 36 batteries |
| --- | --- |
| 18 | foldable lanterns with 36 lights |

e) 1 army observation telescope

2. Otherwise as for a mobile combat engineer company yet without the engineer and close combat equipment carts (including loads) and the engineer range finder 03.

The following drawing materials will be stowed on the baggage cart:

1 large box containing:

| 1 canister with 6 m | tracing paper |
| --- | --- |
| 6 m | drawing paper |
| 6 m | drawing canvas |
| 2 | set squares |

1 closable colour box containing:

| 1 set | Bohrmann colours for topografic map colouring |
| --- | --- |
| 1 piece | China ink |
| 4 | small China ink dishes |
| 2 | China ink brushes |

1 box containing:

| 1 | cardboard box with coloured pencils |
| --- | --- |
| 1 | erasing knife |
| 6 | pencils ( Faber 2-4) |
| 2 | rubbers for ink and pencil |
| 1 | canister with 25 drawing pins |
| 2 | drawing pen holders |
| 1 | canister with 1 sponge |
| 1 | canister with 25 drawing pens and 25 different steel pens |
| 1 | large duplicator including accessories |
| 1 set | medium-sized technical drawing tools |
| 1 | T-square with moveable arm |

1 sketch bag containing:

| 1 | pair of compasses |
| --- | --- |
| 1 | wooden three-sided rule |
| 2 | carpenter’s pencils |
| 1 | cardboard box with coloured pencils |
| 1 | rubber |
| 1 | pen knife |
| 1 | sketch board with small compass |
| 2 | angle irons |
